# Supplementary material for: High performance flexible memristors based on a lead free AgBiI4perovskite with an ultralow operating voltage
Source: Royal Society of Chemistry journal article supplement (doi:10.1039/d0tc03287e), 2020-01-01
Supplement: d0tc03287e1.pdf [file d0tc03287e1.pdf]

## Supporting information

### High Performance Flexible Memristor Based on Lead Free $\text{AgBiI}_4$

### Perovskite with Ultralow Operating Voltage

Haibo Ye<sup>1</sup>, Bo Sun<sup>2□</sup>, Ziyi Wang<sup>1</sup>, Zhiyong Liu<sup>1</sup>, Xuning Zhang<sup>1</sup>, Xianhua Tan<sup>1</sup>, Tielin Shi<sup>1</sup>, Zirong Tang<sup>1</sup>, Guanglan Liao<sup>13\*</sup>

<sup>1</sup>*State Key Laboratory of Digital Manufacturing Equipment and Technology, Huazhong University of Science and Technology, Wuhan 430074, China*

<sup>2</sup>*School of Aerospace Engineering, Huazhong University of Science and Technology, Wuhan 430074, China*

<sup>3</sup>*Shenzhen Huazhong University of Science and Technology Research Institute, Shenzhen 518057, China*

\* Address correspondence to (B Sun, G. Liao) [bosun@hust.edu.cn](mailto:bosun@hust.edu.cn), [guanglan.liao@hust.edu.cn](mailto:guanglan.liao@hust.edu.cn).

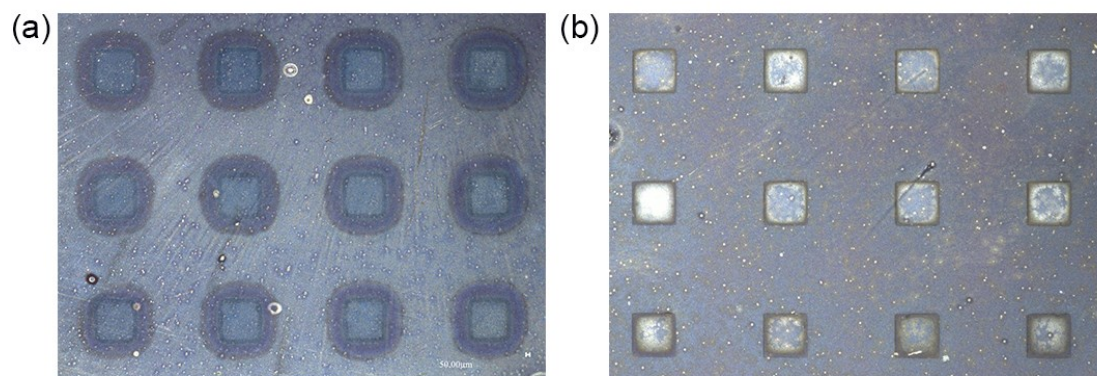

**Fig. S1** (a) The photograph of device without PMMA layer. (b) The photograph of device with PMMA layer.

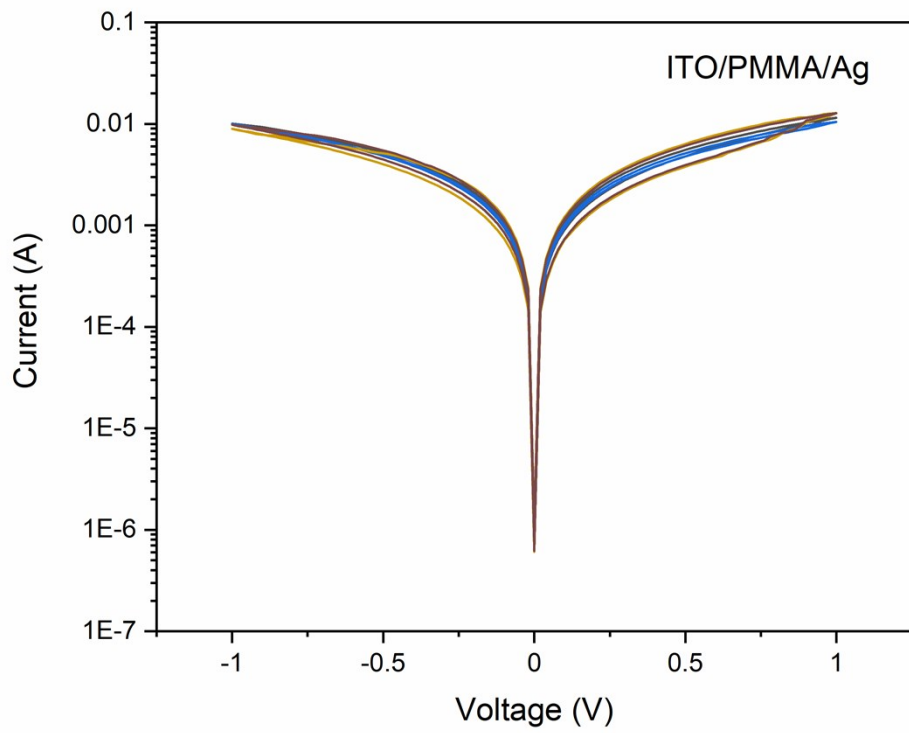

**Fig. S2** The current-voltage ( $I-V$ ) characteristics of the PMMA with a structure of ITO/PMMA/Ag.

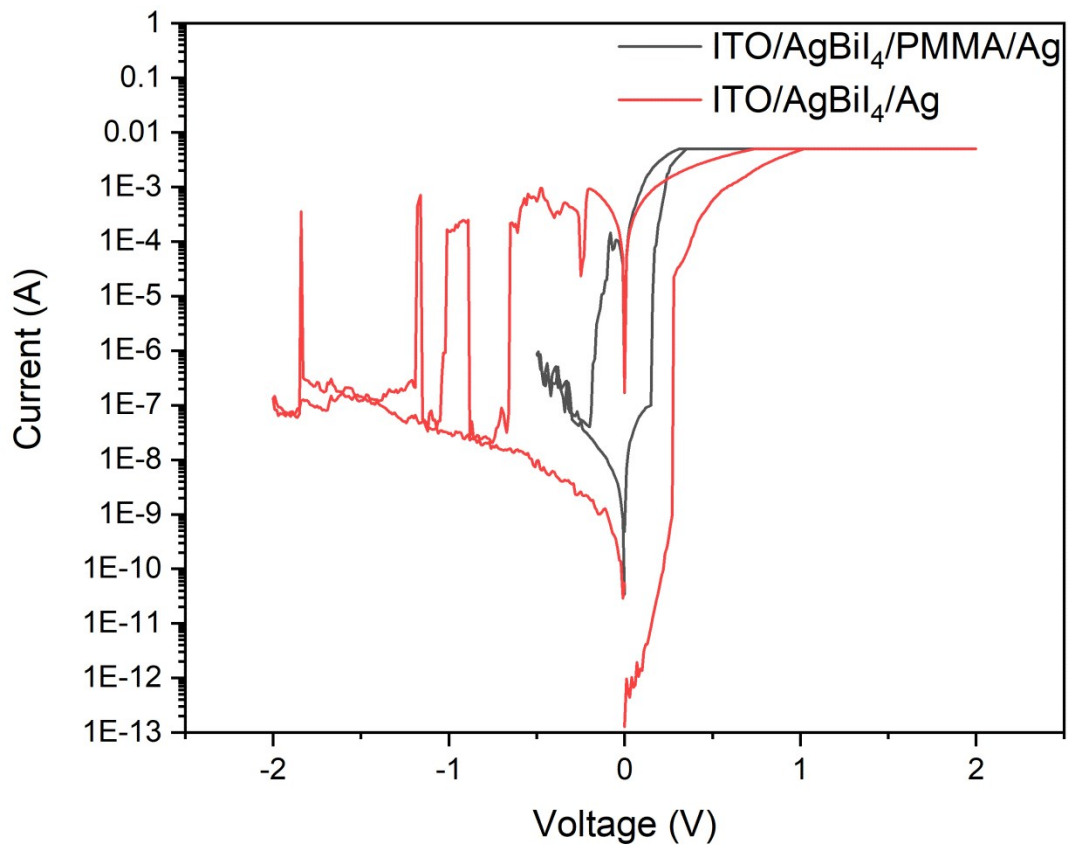

**Fig. S3** The current-voltage ( $I$ - $V$ ) characteristics of the AgBiI<sub>4</sub> based memory devices with or without PMMA insulating layer.

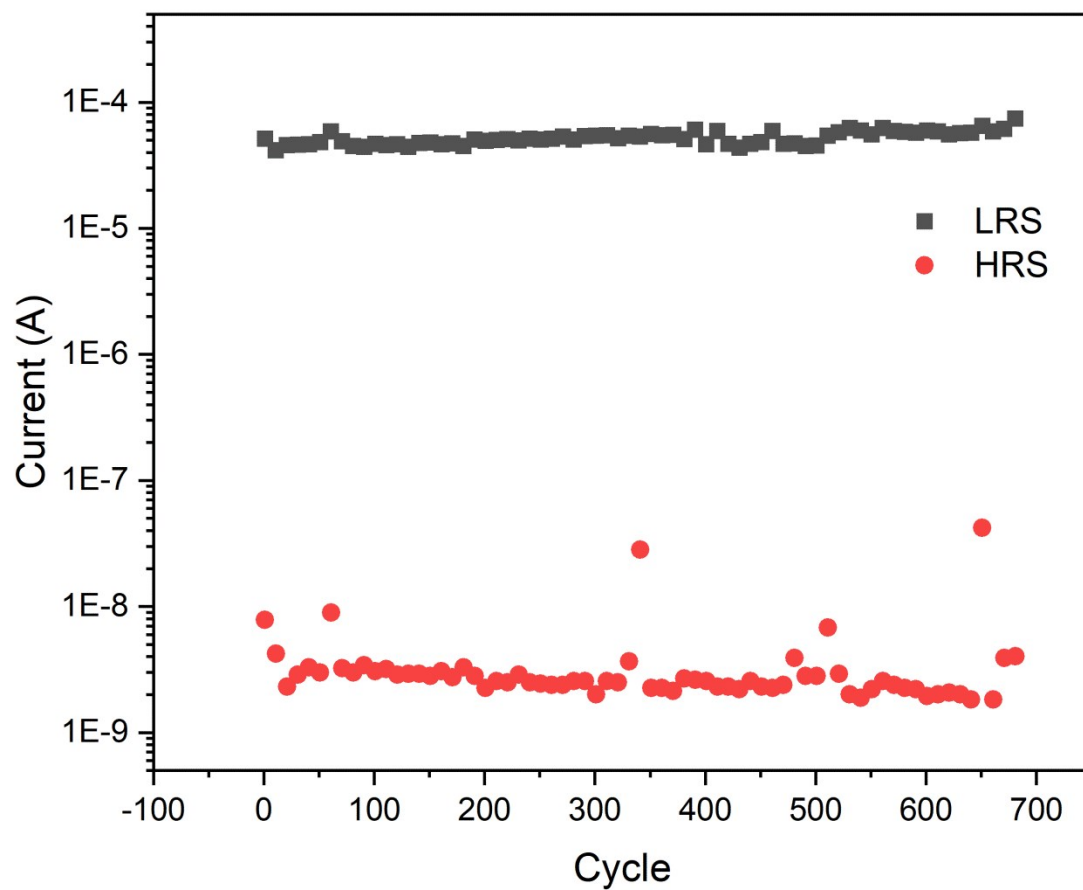

Fig. S4 The switching endurance property of the memory device.

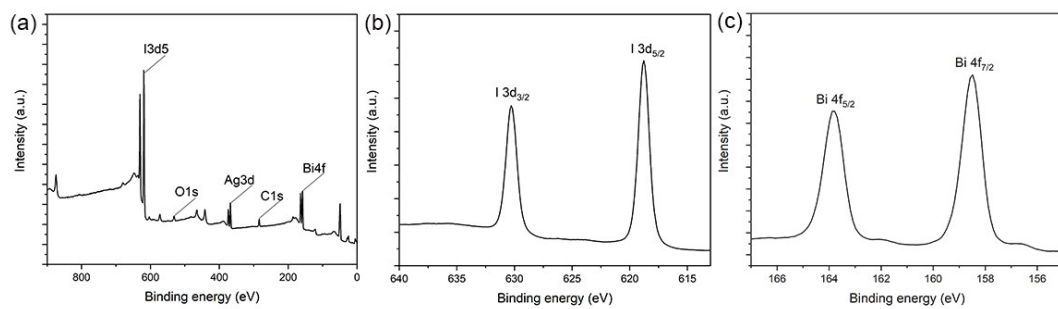

**Fig. S5** The XPS survey of the AgBiI<sub>4</sub> film.

Table. S1 Comparison of various perovskite-based RRAM devices.

| Structure                                                                                                                           | SET Voltage [V] | RESET Voltage [V] | Retention Time [s]  | Stable Endurance [times] | ON/OFF ratio    | Ref.        |
|-------------------------------------------------------------------------------------------------------------------------------------|-----------------|-------------------|---------------------|--------------------------|-----------------|-------------|
| Au/CH <sub>3</sub> NH <sub>3</sub> PbI <sub>3</sub> /ITO/PET                                                                        | 0.7             | -0.5              | 10 <sup>4</sup>     | 400                      | 10              | [16]        |
| Au/Cs <sub>3</sub> Bi <sub>3</sub> I <sub>9</sub> /ITO/PET                                                                          | 0.3             | -0.5              | 10 <sup>4</sup>     | -                        | 10 <sup>3</sup> | [17]        |
| Au/CH <sub>3</sub> NH <sub>3</sub> PbI <sub>3</sub> /Pt/Ti/SiO <sub>2</sub> /Si                                                     | 1               | -1                | 10 <sup>5</sup>     | 500                      | 10 <sup>3</sup> | [50]        |
| Au/CH <sub>3</sub> NH <sub>3</sub> PbCl <sub>x</sub> I <sub>3-x</sub> /TiO <sub>2</sub> /Ti                                         | 1               | -1.58             | 10 <sup>4</sup>     | -                        | 20              | [51]        |
| Ag/CH <sub>3</sub> NH <sub>3</sub> PbBr <sub>2.54</sub> Cl <sub>0.46</sub> /FTO/glass                                               | 0.7             | -1.3              | 10 <sup>3</sup>     | 250                      | 10 <sup>3</sup> | [52]        |
| Ag/CH <sub>3</sub> NH <sub>3</sub> PbBr <sub>3</sub> /FTO/glass                                                                     | 3               | -4                | 10 <sup>3</sup>     | 250                      | 10 <sup>3</sup> | [52]        |
| Ag/CH <sub>3</sub> NH <sub>3</sub> PbI <sub>3-x</sub> Cl <sub>x</sub> /FTO/glass                                                    | 1.5             | -1.5              | 4×10 <sup>4</sup>   | 10 <sup>3</sup>          | 10 <sup>2</sup> | [53]        |
| Au/(NH <sub>2</sub> -dendrimer/oleic acid-stabilized BaTiO <sub>3</sub> ) <sub>n</sub> /Pt/Ti/SiO <sub>2</sub> /Si                  | 1.5             | -1.8              | 10 <sup>5</sup>     | 200                      | 10 <sup>4</sup> | [54]        |
| Ag/BiMnO <sub>3</sub> /Ti                                                                                                           | 3.9             | -3.75             | -                   | 100                      | 10              | [55]        |
| Au/CH <sub>3</sub> NH <sub>3</sub> PbI <sub>3-x</sub> Cl <sub>x</sub> /FTO/glass                                                    | 0.8             | -0.6              | 10 <sup>4</sup>     | 100                      | 2               | [56]        |
| Au/Ti/ZnO/Nb-doped SrTiO <sub>3</sub> /Al/Au                                                                                        | -2              | 3                 | 10 <sup>4</sup>     | 30                       | 10 <sup>2</sup> | [57]        |
| Al/CsPbBr <sub>3</sub> /PEDOT:PSS/ITO/PET                                                                                           | -0.6            | 1.7               | -                   | 50                       | 10 <sup>2</sup> | [58]        |
| Cu/CH <sub>3</sub> NH <sub>3</sub> PbI <sub>3</sub> /poly(3,4-ethyl enedioxy-thiophene)-poly(styrenesulfonate)(PEDOT:PSS)/ITO/glass | -1              | 1.8               | 10 <sup>4</sup>     | 3000                     | 10 <sup>4</sup> | [59]        |
| Au/BaTi <sub>0.95</sub> Co <sub>0.05</sub> O <sub>3</sub> /SrRuO <sub>3</sub> /mica                                                 | 12              | -6                | 8.6×10 <sup>4</sup> | 3.6×10 <sup>5</sup>      | 50              | [60]        |
| Ag/PMMA/AgBiI <sub>4</sub> /ITO                                                                                                     | 0.16            | -0.16             | 10 <sup>4</sup>     | 700                      | 10 <sup>4</sup> | [This work] |

Table. S2 Element ratios of AgBiI<sub>4</sub> layer from XPS survey.

| Element | Atomic (%) |
|---------|------------|
| Ag      | 8.54       |
| Bi      | 7.87       |
| I       | 31.38      |
